# Supplementary material
Source: PubMed Central journal article supplement (PMC3110268)

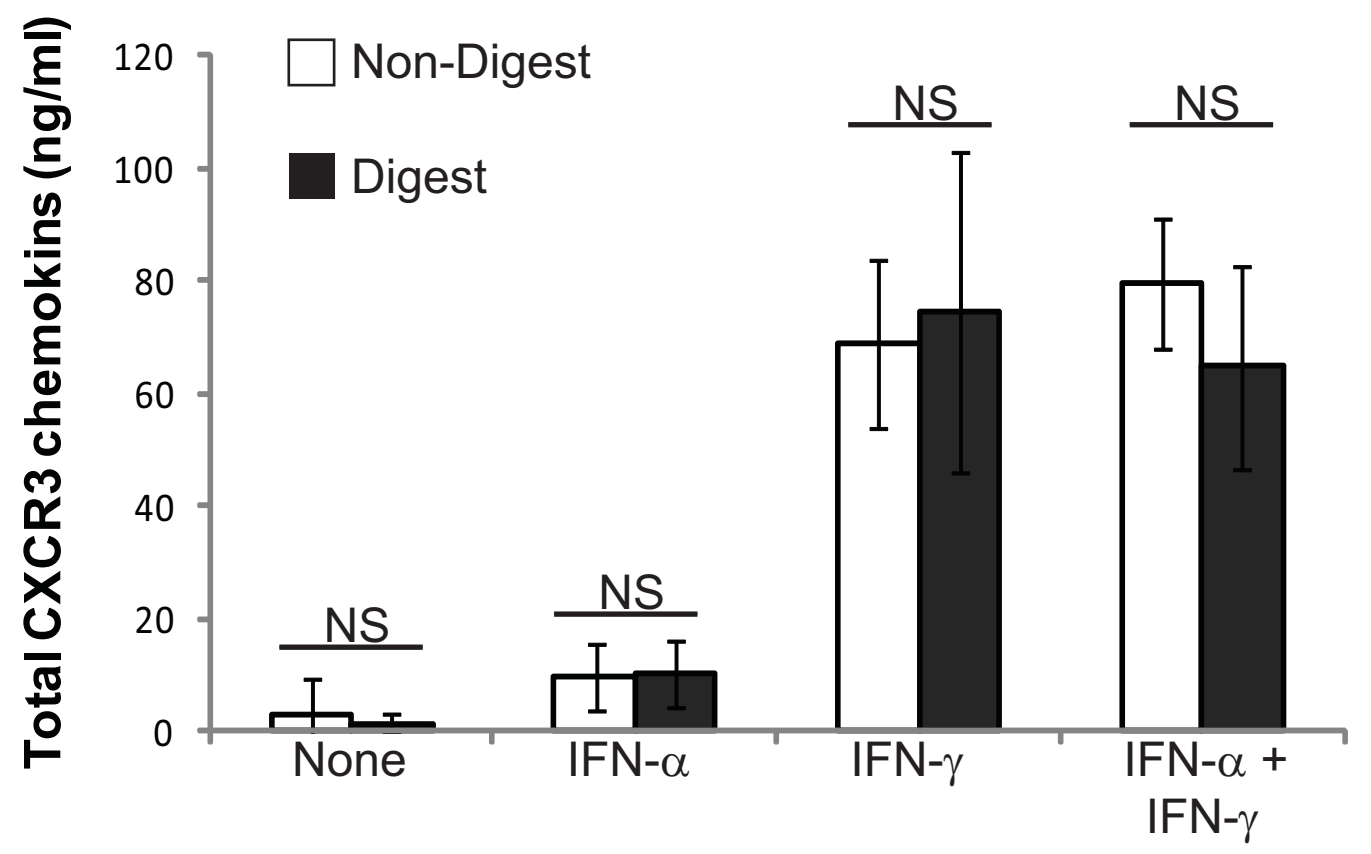

Supplement: NIHMS253549-supplement-1.pdf [file NIHMS253549-supplement-1.pdf]

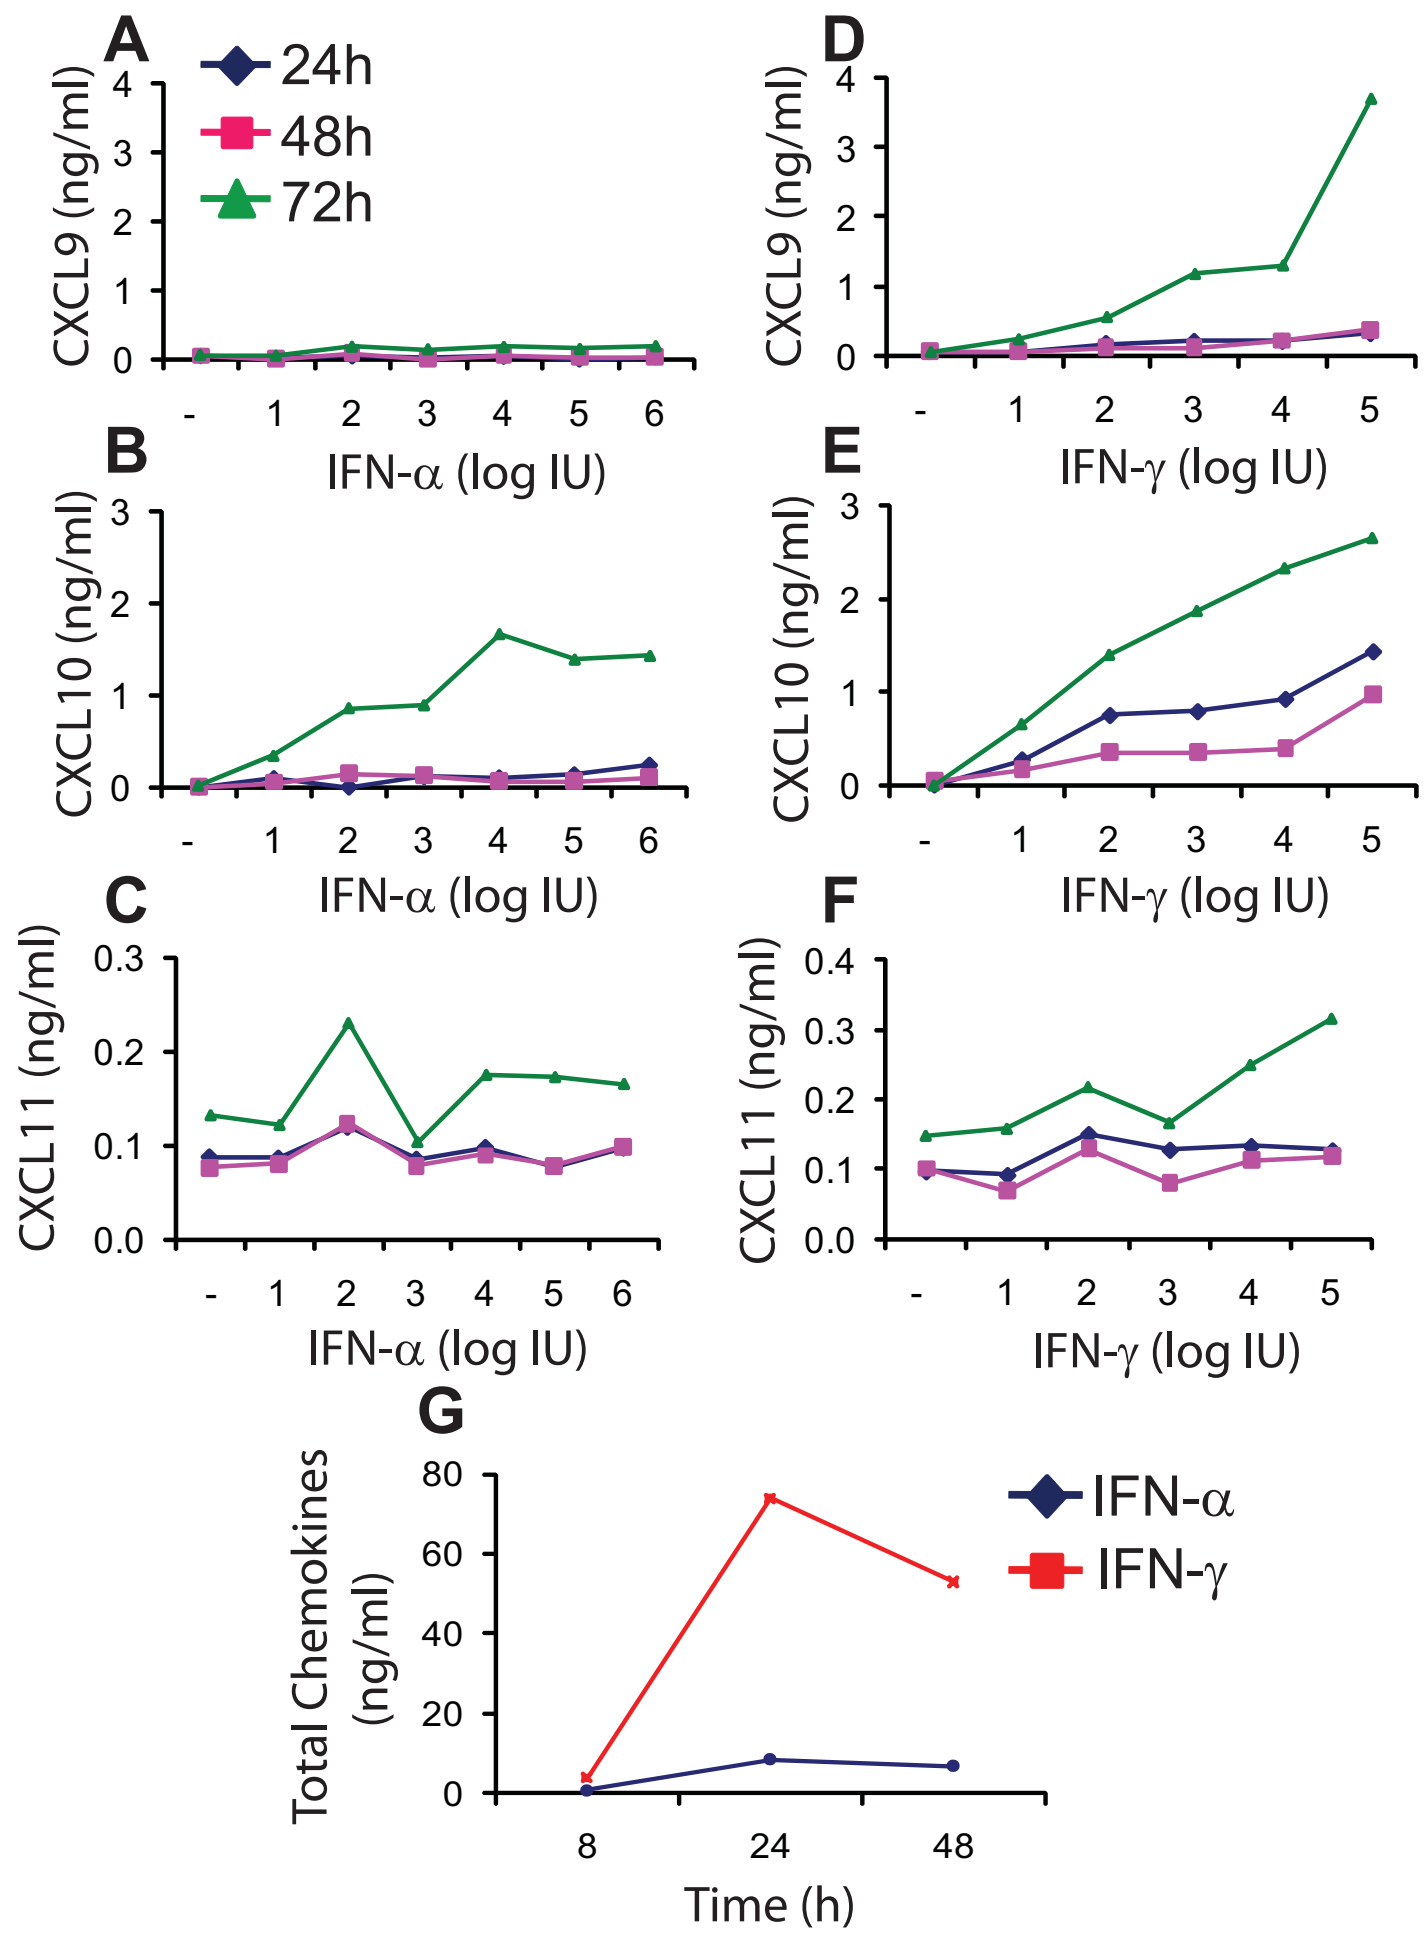

Supplement: NIHMS253549-supplement-2.pdf [file NIHMS253549-supplement-2.pdf]

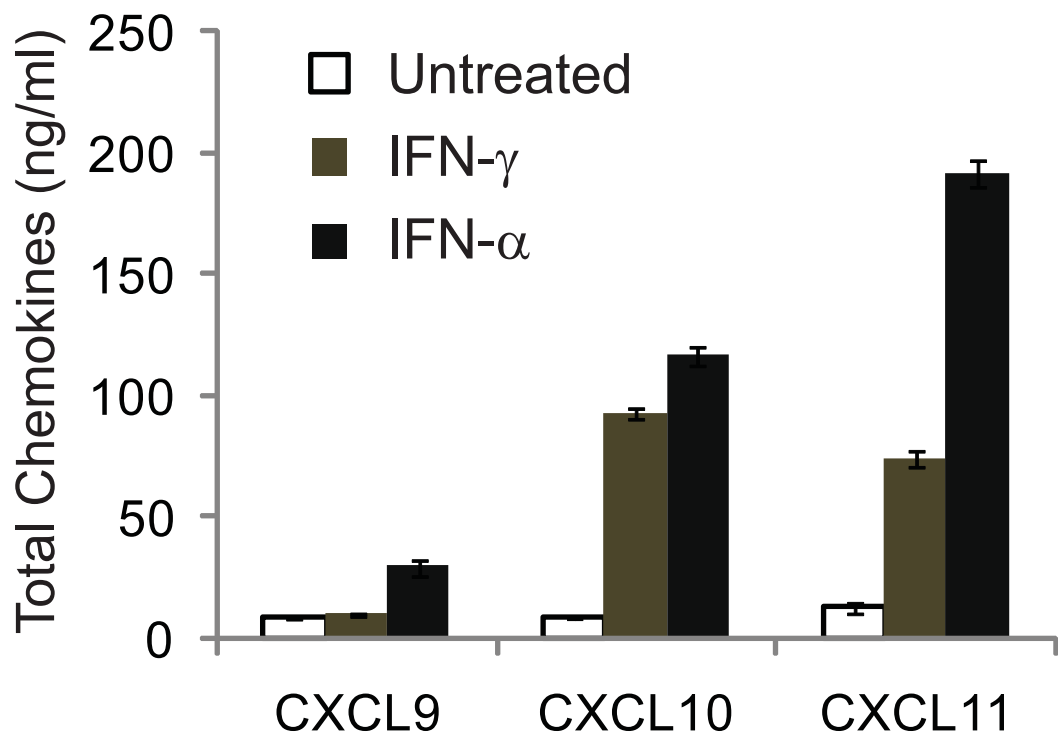

Supplement: NIHMS253549-supplement-3.pdf [file NIHMS253549-supplement-3.pdf]
